# Supplementary material
Source: publisher figshare collection journal article supplement (https://tandf.figshare.com/ndownloader/files/21677013)
Supplement: Supplementary file 1 [file 21677013]

**ORAL TREATMENT WITH PROBENECID PREVENTS SPERM DEGRADATION IN PATIENTS WITH SPINAL CORD INJURY: A PROTEOMICS ANALYSIS**

**Authors:**

Mariana Camargo, MSc, PhD a

Emad Ibrahim, MD b

Teodoro C. Aballa, MSc b

Karina H. M. Cardozo, PhD c

Valdemir M. Carvalho, PhD c

Charles M. Lynne, MD b

Nancy L. Brackett, PhD, HCLD b

*Ricardo P. Bertolla, DVM, PhD a,d

**Supplementary table 1.** The complete list of proteins quantified in seminal plasma of men with SCI before and after the treatment with probenecid.

| **Uniprot Access** | **Protein Name** | **Fold-change** | **p** |
| --- | --- | --- | --- |
| P29218 | Inositol monophosphatase 1 | 0.22 | 0.0431 |
| Q687X5 | Metalloreductase STEAP4 | 0.41 | 0.0431 |
| Q8WXA2 | Prostate and testis expressed protein 1 | 0.55 | 0.0382 |
| P21810 | Biglycan | 0.59 | 0.0425 |
| P46940 | Ras GTPase-activating-like protein IQGAP1 | 0.60 | 0.0464 |
| Q14507 | Epididymal secretory protein E3-alpha | 0.63 | 0.0209 |
| Q9H1M3 | Beta-defensin 129 | 0.67 | 0.0499 |
| Q71U36 | Tubulin alpha-1A chain | 0.73 | 0.0464 |
| Q86UD1 | Out at first protein homolog | 0.74 | 0.0173 |
| P35625 | Metalloproteinase inhibitor 3 | 0.74 | 0.0425 |
| P10323 | Acrosin | 0.76 | 0.0431 |
| P12955 | Xaa-Pro dipeptidase | 0.78 | 0.0431 |
| P09211 | Glutathione S-transferase P | 0.83 | 0.0109 |
| P40926 | Malate dehydrogenase, mitochondrial | 0.86 | 0.0499 |
| P49913 | Cathelicidin antimicrobial peptide | 0.87 | 0.0209 |
| P50395 | Rab GDP dissociation inhibitor beta | 0.93 | 0.0382 |
| P14618 | Pyruvate kinase PKM | 0.94 | 0.0382 |
| P11142 | Heat shock cognate 71 kDa protein | 1.07 | 0.0152 |
| P61769 | Beta-2-microglobulin | 1.07 | 0.0209 |
| P17050 | Alpha-N-acetylgalactosaminidase | 1.17 | 0.0464 |
| Q9NZ08 | Endoplasmic reticulum aminopeptidase 1 | 1.21 | 0.0431 |
| Q13443 | Disintegrin and metalloproteinase domain-containing protein 9 | 1.69 | 0.0431 |
| P01036 | Cystatin-S | 2.49 | 0.0077 |
| P06744 | Glucose-6-phosphate isomerase | - | 0.0506 |
| P07858 | Cathepsin B | - | 0.0506 |
| P07900 | Heat shock protein HSP 90-alpha | - | 0.0506 |
| P63261 | Actin, cytoplasmic 2 | - | 0.0506 |
| Q5VTE0 | Putative elongation factor 1-alpha-like 3 | - | 0.0506 |
| Q92743 | Serine protease HTRA1 | - | 0.0506 |
| P98160 | Basement membrane-specific heparan sulfate proteoglycan core protein | - | 0.0630 |
| P07602 | Prosaposin | - | 0.0663 |
| Q99519 | Sialidase-1 | - | 0.0663 |
| O95274 | Ly6/PLAUR domain-containing protein 3 | - | 0.0679 |
| P00746 | Complement factor D | - | 0.0679 |
| P18206 | Vinculin | - | 0.0679 |
| P47756 | F-actin-capping protein subunit beta | - | 0.0679 |
| P50991 | T-complex protein 1 subunit delta | - | 0.0679 |
| Q8IUA0 | WAP four-disulfide core domain protein 8 | - | 0.0679 |
| Q8NEB7 | Acrosin-binding protein | - | 0.0679 |
| Q9H1M4 | Beta-defensin 127 | - | 0.0679 |
| P04196 | Histidine-rich glycoprotein | - | 0.0687 |
| P11766 | Alcohol dehydrogenase class-3 | - | 0.0687 |
| Q9UBR2 | Cathepsin Z | - | 0.0687 |
| P19957 | Elafin | - | 0.0858 |
| P30041 | Peroxiredoxin-6 | - | 0.0858 |
| P49327 | Fatty acid synthase | - | 0.0858 |
| P49788 | Retinoic acid receptor responder protein 1 | - | 0.0858 |
| Q13510 | Acid ceramidase | - | 0.0858 |
| O75556 | Mammaglobin-B | - | 0.0910 |
| P13489 | Ribonuclease inhibitor | - | 0.0910 |
| O00560 | Syntenin-1 | - | 0.0929 |
| P36955 | Pigment epithelium-derived factor | - | 0.0929 |
| P06681 | Complement C2 | - | 0.1088 |
| P07225 | Vitamin K-dependent protein S | - | 0.1088 |
| P09382 | Galectin-1 | - | 0.1088 |
| P13667 | Protein disulfide-isomerase A4 | - | 0.1088 |
| P15907 | Beta-galactoside alpha-2,6-sialyltransferase 1 | - | 0.1088 |
| P17936 | Insulin-like growth factor-binding protein 3 | - | 0.1088 |
| P26641 | Elongation factor 1-gamma | - | 0.1088 |
| P51888 | Prolargin | - | 0.1088 |
| P61019 | Ras-related protein Rab-2A | - | 0.1088 |
| Q86UX2 | Inter-alpha-trypsin inhibitor heavy chain H5 | - | 0.1088 |
| Q96QE4 | Leucine-rich repeat-containing protein 37B | - | 0.1088 |
| Q9BS86 | Zona pellucida-binding protein 1 | - | 0.1088 |
| Q9H3U7 | SPARC-related modular calcium-binding protein 2 | - | 0.1088 |
| O75629 | Protein CREG1 | - | 0.1097 |
| P02766 | Transthyretin | - | 0.1097 |
| P04075 | Fructose-bisphosphate aldolase A | - | 0.1097 |
| P06702 | Protein S100-A9 | - | 0.1097 |
| P08238 | Heat shock protein HSP 90-beta | - | 0.1097 |
| P10253 | Lysosomal alpha-glucosidase | - | 0.1097 |
| Q7Z304 | MAM domain-containing protein 2 | - | 0.1097 |
| Q9NR99 | Matrix-remodeling-associated protein 5 | - | 0.1097 |
| P09972 | Fructose-bisphosphate aldolase C | - | 0.1159 |
| Q15257 | Serine/threonine-protein phosphatase 2A activator | - | 0.1159 |
| P02649 | Apolipoprotein E (Apo-E) | - | 0.1282 |
| P02748 | Complement component C9 | - | 0.1282 |
| P07108 | Acyl-CoA-binding protein | - | 0.1282 |
| P13639 | Elongation factor 2 | - | 0.1282 |
| Q96BQ1 | Protein FAM3D | - | 0.1282 |
| O60513 | Beta-1,4-galactosyltransferase 4 | - | 0.1380 |
| P23381 | Tryptophan--tRNA ligase, cytoplasmic | - | 0.1380 |
| P28072 | Proteasome subunit beta type-6 | - | 0.1380 |
| P55786 | Puromycin-sensitive aminopeptidase | - | 0.1380 |
| P59998 | Actin-related protein 2/3 complex subunit 4 | - | 0.1380 |
| Q92692 | Nectin-2 | - | 0.1380 |
| O94985 | Calsyntenin-1 | - | 0.1386 |
| P05156 | Complement factor I | - | 0.1386 |
| P0DMV8 | Heat shock 70 kDa protein 1A | - | 0.1386 |
| P0DMV9 | Heat shock 70 kDa protein 1B | - | 0.1386 |
| P08473 | Neprilysin | - | 0.1386 |
| P12724 | Eosinophil cationic protein | - | 0.1386 |
| P23284 | Peptidyl-prolyl cis-trans isomerase B | - | 0.1386 |
| P39060 | Collagen alpha-1(XVIII) chain | - | 0.1386 |
| P59666 | Neutrophil defensin 3 | - | 0.1386 |
| Q92896 | Golgi apparatus protein 1 | - | 0.1386 |
| P22732 | Solute carrier family 2, facilitated glucose transporter member 5 | - | 0.1441 |
| P31025 | Lipocalin-1 | - | 0.1441 |
| P54652 | Heat shock-related 70 kDa protein 2 | - | 0.1441 |
| Q5GAN4 | Probable inactive ribonuclease-like protein 12 | - | 0.1441 |
| Q8IXK2 | Polypeptide N-acetylgalactosaminyltransferase 12 | - | 0.1441 |
| Q8TAA3 | Proteasome subunit alpha-type 8 | - | 0.1441 |
| P52565 | Rho GDP-dissociation inhibitor 1 | - | 0.1614 |
| P61626 | Lysozyme C | - | 0.1614 |
| Q06830 | Peroxiredoxin-1 | - | 0.1614 |
| Q6ZN30 | Zinc finger protein basonuclin-2 | - | 0.1614 |
| Q53GD3 | Choline transporter-like protein 4 | - | 0.1730 |
| O15393 | Transmembrane protease serine 2 | - | 0.1731 |
| O75487 | Glypican-4 | - | 0.1731 |
| P02750 | Leucine-rich alpha-2-glycoprotein | - | 0.1731 |
| P06865 | Beta-hexosaminidase subunit alpha | - | 0.1731 |
| P07737 | Profilin-1 | - | 0.1731 |
| P12273 | Prolactin-inducible protein | - | 0.1731 |
| P49221 | Protein-glutamine gamma-glutamyltransferase 4 | - | 0.1731 |
| Q13275 | Semaphorin-3F | - | 0.1731 |
| Q16769 | Glutaminyl-peptide cyclotransferase | - | 0.1731 |
| Q9UBX1 | Cathepsin F | - | 0.1731 |
| P00918 | Carbonic anhydrase 2 | - | 0.1763 |
| P35579 | Myosin-9 | - | 0.1763 |
| Q13421 | Mesothelin | - | 0.1763 |
| Q13449 | Limbic system-associated membrane protein | - | 0.1763 |
| Q8NHP8 | Putative phospholipase B-like 2 | - | 0.1763 |
| Q9UHI8 | A disintegrin and metalloproteinase with thrombospondin motifs 1 | - | 0.1763 |
| O00194 | Ras-related protein Rab-27B | - | 0.1797 |
| O15144 | Actin-related protein 2/3 complex subunit 2 | - | 0.1797 |
| O43175 | D-3-phosphoglycerate dehydrogenase | - | 0.1797 |
| O43490 | Prominin-1 | - | 0.1797 |
| O75594 | Peptidoglycan recognition protein 1 | - | 0.1797 |
| P00736 | Complement C1r subcomponent | - | 0.1797 |
| P01701 | Immunoglobulin lambda variable 1-51 | - | 0.1797 |
| P04003 | C4b-binding protein alpha chain | - | 0.1797 |
| P04040 | Catalase | - | 0.1797 |
| P04179 | Superoxide dismutase [Mn], mitochondrial | - | 0.1797 |
| P04792 | Heat shock protein beta-1 | - | 0.1797 |
| P07358 | Complement component C8 beta chain | - | 0.1797 |
| P07954 | Fumarate hydratase, mitochondrial | - | 0.1797 |
| P08185 | Corticosteroid-binding globulin | - | 0.1797 |
| P13671 | Complement component C6 | - | 0.1797 |
| P13688 | Carcinoembryonic antigen-related cell adhesion molecule 1 | - | 0.1797 |
| P16562 | Cysteine-rich secretory protein 2 | - | 0.1797 |
| P19022 | Cadherin-2 | - | 0.1797 |
| P23470 | Receptor-type tyrosine-protein phosphatase gamma | - | 0.1797 |
| P35237 | Serpin B6 | - | 0.1797 |
| P36222 | Chitinase-3-like protein 1 | - | 0.1797 |
| P36871 | Phosphoglucomutase-1 | - | 0.1797 |
| P48643 | T-complex protein 1 subunit epsilon | - | 0.1797 |
| P50591 | Tumor necrosis factor ligand superfamily member 10 | - | 0.1797 |
| P50895 | Basal cell adhesion molecule | - | 0.1797 |
| P51884 | Lumican | - | 0.1797 |
| P61088 | Ubiquitin-conjugating enzyme E2 N | - | 0.1797 |
| Q01638 | Interleukin-1 receptor-like 1 | - | 0.1797 |
| Q14264 | Endogenous retrovirus group 3 member 1 Env polyprotein | - | 0.1797 |
| Q15843 | NEDD8 | - | 0.1797 |
| Q5T4F7 | Secreted frizzled-related protein 5 | - | 0.1797 |
| Q7RTZ1 | Ovochymase-2 | - | 0.1797 |
| Q8IXA5 | Sperm acrosome membrane-associated protein 3 | - | 0.1797 |
| Q8N114 | Protein shisa-5 | - | 0.1797 |
| Q8TE99 | 2-phosphoxylose phosphatase 1 | - | 0.1797 |
| Q99523 | Sortilin | - | 0.1797 |
| Q9BWD1 | Acetyl-CoA acetyltransferase, cytosolic | - | 0.1797 |
| Q9BX67 | Junctional adhesion molecule C | - | 0.1797 |
| Q9H0W9 | Ester hydrolase C11orf54 | - | 0.1797 |
| Q9H9H4 | Vacuolar protein sorting-associated protein 37B | - | 0.1797 |
| P00738 | Haptoglobin | - | 0.2076 |
| P14384 | Carboxypeptidase M | - | 0.2076 |
| Q6YHK3 | CD109 antigen | - | 0.2076 |
| P02647 | Apolipoprotein A-I | - | 0.2135 |
| P11021 | Endoplasmic reticulum chaperone BiP | - | 0.2135 |
| P14174 | Macrophage migration inhibitory factor | - | 0.2135 |
| P16035 | Metalloproteinase inhibitor 2 | - | 0.2135 |
| P21266 | Glutathione S-transferase Mu 3 | - | 0.2135 |
| P54802 | Alpha-N-acetylglucosaminidase | - | 0.2135 |
| Q02818 | Nucleobindin-1 | - | 0.2135 |
| Q075Z2 | Binder of sperm protein homolog 1 | - | 0.2135 |
| Q08380 | Galectin-3-binding protein | - | 0.2135 |
| Q15582 | Transforming growth factor-beta-induced protein ig-h3 | - | 0.2135 |
| Q15828 | Cystatin-M | - | 0.2135 |
| Q6PCB0 | von Willebrand factor A domain-containing protein 1 | - | 0.2135 |
| Q99497 | Protein/nucleic acid deglycase DJ-1 | - | 0.2135 |
| Q9UNW1 | Multiple inositol polyphosphate phosphatase 1 | - | 0.2135 |
| O14494 | Phospholipid phosphatase 1 | - | 0.2249 |
| P02753 | Retinol-binding protein 4 | - | 0.2249 |
| P13797 | Plastin-3 | - | 0.2249 |
| P48723 | Heat shock 70 kDa protein 13 | - | 0.2249 |
| P04062 | Glucosylceramidase | - | 0.2367 |
| Q01469 | Fatty acid-binding protein 5 | - | 0.2367 |
| Q13228 | Methanethiol oxidase | - | 0.2367 |
| Q9BXJ1 | Complement C1q tumor necrosis factor-related protein 1 | - | 0.2367 |
| Q9H3G5 | Probable serine carboxypeptidase CPVL | - | 0.2367 |
| P11717 | Cation-independent mannose-6-phosphate receptor | - | 0.2489 |
| P25789 | Proteasome subunit alpha type-4 | - | 0.2489 |
| P34932 | Heat shock 70 kDa protein 4 | - | 0.2489 |
| Q03591 | Complement factor H-related protein 1 | - | 0.2489 |
| Q06481 | Amyloid-like protein 2 | - | 0.2489 |
| O14786 | Neuropilin-1 | - | 0.2604 |
| O60888 | Protein CutA | - | 0.2604 |
| P01019 | Angiotensinogen | - | 0.2604 |
| P01042 | Kininogen-1 | - | 0.2604 |
| P04406 | Glyceraldehyde-3-phosphate dehydrogenase | - | 0.2604 |
| Q99878 | Histone H2A type 1-J | - | 0.2604 |
| P05154 | Plasma serine protease inhibitor | - | 0.2604 |
| P11279 | Lysosome-associated membrane glycoprotein 1 | - | 0.2604 |
| P17900 | Ganglioside GM2 activator | - | 0.2604 |
| P20151 | Kallikrein-2 | - | 0.2604 |
| P25311 | Zinc-alpha-2-glycoprotein | - | 0.2604 |
| Q96GW7 | Brevican core protein | - | 0.2604 |
| Q9UBX7 | Kallikrein-11 | - | 0.2604 |
| Q9Y4L1 | Hypoxia up-regulated protein 1 | - | 0.2604 |
| P15259 | Phosphoglycerate mutase 2 | - | 0.2626 |
| P31151 | Protein S100-A7 | - | 0.2626 |
| Q13438 | Protein OS-9 | - | 0.2626 |
| Q71DI3 | Histone H3.2 | - | 0.2626 |
| O00754 | Lysosomal alpha-mannosidase | - | 0.2733 |
| P14550 | Alcohol dehydrogenase | - | 0.2733 |
| P15153 | Ras-related C3 botulinum toxin substrate 2 | - | 0.2733 |
| P21399 | Cytoplasmic aconitate hydratase | - | 0.2733 |
| P27348 | 14-3-3 protein theta | - | 0.2733 |
| P28066 | Proteasome subunit alpha type-5 | - | 0.2733 |
| Q16851 | UTP--glucose-1-phosphate uridylyltransferase | - | 0.2733 |
| Q8NFZ8 | Cell adhesion molecule 4 | - | 0.2733 |
| O75340 | Programmed cell death protein 6 | - | 0.2850 |
| P01780 | Immunoglobulin heavy variable 3-7 | - | 0.2850 |
| P06576 | ATP synthase subunit beta, mitochondrial | - | 0.2850 |
| P09543 | 2',3'-cyclic-nucleotide 3'-phosphodiesterase | - | 0.2850 |
| P09622 | Dihydrolipoyl dehydrogenase, mitochondrial | - | 0.2850 |
| P20337 | Ras-related protein Rab-3B | - | 0.2850 |
| P31947 | 14-3-3 protein sigma | - | 0.2850 |
| P60033 | CD81 antigen | - | 0.2850 |
| Q6BCY4 | NADH-cytochrome b5 reductase 2 | - | 0.2850 |
| Q6EMK4 | Vasorin | - | 0.2850 |
| Q92484 | Acid sphingomyelinase-like phosphodiesterase 3a | - | 0.2850 |
| Q9BY14 | Testis-expressed protein 101 | - | 0.2850 |
| Q9Y653 | Adhesion G-protein coupled receptor G1 | - | 0.2850 |
| O94813 | Slit homolog 2 protein | - | 0.3105 |
| Q8IZP9 | Adhesion G-protein coupled receptor G2 | - | 0.3105 |
| O00299 | Chloride intracellular channel protein 1 | - | 0.3139 |
| P00450 | Ceruloplasmin | - | 0.3139 |
| P01023 | Alpha-2-macroglobulin | - | 0.3139 |
| P02765 | Alpha-2-HS-glycoprotein | - | 0.3139 |
| P07195 | L-lactate dehydrogenase B chain | - | 0.3139 |
| P0C0L5 | Complement C4-B | - | 0.3139 |
| P23528 | Cofilin-1 | - | 0.3139 |
| P27487 | Dipeptidyl peptidase 4 | - | 0.3139 |
| P27797 | Calreticulin | - | 0.3139 |
| P34096 | Ribonuclease 4 | - | 0.3139 |
| P62258 | 14-3-3 protein epsilon | - | 0.3139 |
| O95716 | Ras-related protein Rab-3D | - | 0.3270 |
| P00441 | Superoxide dismutase [Cu-Zn] | - | 0.3270 |
| P48745 | Protein NOV homolog | - | 0.3270 |
| Q96BH3 | Epididymal sperm-binding protein 1 | - | 0.3270 |
| O00253 | Agouti-related protein | - | 0.3452 |
| P05386 | 60S acidic ribosomal protein P1 | - | 0.3452 |
| P07384 | Calpain-1 catalytic subunit | - | 0.3452 |
| P51854 | Transketolase-like protein 1 | - | 0.3452 |
| Q99816 | Tumor susceptibility gene 101 protein | - | 0.3452 |
| P06312 | Immunoglobulin kappa variable 4-1 | - | 0.3454 |
| P07205 | Phosphoglycerate kinase 2 | - | 0.3454 |
| P49223 | Kunitz-type protease inhibitor 3 | - | 0.3454 |
| P50897 | Palmitoyl-protein thioesterase 1 | - | 0.3454 |
| P68371 | Tubulin beta-4B chain | - | 0.3454 |
| P78371 | T-complex protein 1 subunit beta | - | 0.3454 |
| P00338 | L-lactate dehydrogenase A chain | - | 0.3743 |
| P00352 | Retinal dehydrogenase 1 | - | 0.3743 |
| P00751 | Complement factor B | - | 0.3743 |
| P01859 | Immunoglobulin heavy constant gamma 2 | - | 0.3743 |
| P02675 | Fibrinogen beta chain | - | 0.3743 |
| P05155 | Plasma protease C1 inhibitor | - | 0.3743 |
| P05164 | Myeloperoxidase | - | 0.3743 |
| P08294 | Extracellular superoxide dismutase [Cu-Zn] | - | 0.3743 |
| P09237 | Matrilysin | - | 0.3743 |
| P62987 | Ubiquitin-60S ribosomal protein L40 | - | 0.3743 |
| P15144 | Aminopeptidase N | - | 0.3743 |
| P15309 | Prostatic acid phosphatase | - | 0.3743 |
| P16278 | Beta-galactosidase | - | 0.3743 |
| P16870 | Carboxypeptidase E | - | 0.3743 |
| P30086 | Phosphatidylethanolamine-binding protein 1 | - | 0.3743 |
| P55072 | Transitional endoplasmic reticulum ATPase | - | 0.3743 |
| P80303 | Nucleobindin-2 | - | 0.3743 |
| Q14697 | Neutral alpha-glucosidase AB | - | 0.3743 |
| Q16651 | Prostasin | - | 0.3743 |
| Q66K79 | Carboxypeptidase Z | - | 0.3743 |
| Q96KP4 | Cytosolic non-specific dipeptidase | - | 0.3743 |
| Q9P2K2 | Thioredoxin domain-containing protein 16 | - | 0.3743 |
| Q9Y646 | Carboxypeptidase Q | - | 0.3743 |
| P02743 | Serum amyloid P-component | - | 0.3980 |
| P08603 | Complement factor H | - | 0.3980 |
| P49721 | Proteasome subunit beta type-2 | - | 0.3980 |
| P52907 | F-actin-capping protein subunit alpha-1 | - | 0.3980 |
| P62328 | Thymosin beta-4 | - | 0.3980 |
| Q6ZS30 | Neurobeachin-like protein 1 | - | 0.3980 |
| O75610 | Left-right determination factor 1 | - | 0.4008 |
| P01860 | Immunoglobulin heavy constant gamma 3 | - | 0.4008 |
| P07478 | Trypsin-2 | - | 0.4008 |
| P12277 | Creatine kinase B-type | - | 0.4008 |
| P22314 | Ubiquitin-like modifier-activating enzyme 1 | - | 0.4008 |
| P60953 | Cell division control protein 42 homolog | - | 0.4008 |
| Q6UW15 | Regenerating islet-derived protein 3-gamma | - | 0.4008 |
| Q9Y624 | Junctional adhesion molecule A | - | 0.4008 |
| O00339 | Matrilin-2 | - | 0.4413 |
| O43451 | Maltase-glucoamylase, intestinal | - | 0.4413 |
| O75503 | Ceroid-lipofuscinosis neuronal protein 5 | - | 0.4413 |
| P01011 | Alpha-1-antichymotrypsin | - | 0.4413 |
| P01764 | Immunoglobulin heavy variable 3-23 | - | 0.4413 |
| P01834 | Immunoglobulin kappa constant | - | 0.4413 |
| P01857 | Immunoglobulin heavy constant gamma 1 | - | 0.4413 |
| P02788 | Lactotransferrin | - | 0.4413 |
| P03950 | Angiogenin | - | 0.4413 |
| P04080 | Cystatin-B | - | 0.4413 |
| P04217 | Alpha-1B-glycoprotein | - | 0.4413 |
| P05067 | Amyloid-beta A4 protein | - | 0.4413 |
| P07237 | Protein disulfide-isomerase | - | 0.4413 |
| P07864 | L-lactate dehydrogenase C chain | - | 0.4413 |
| P12814 | Alpha-actinin-1 | - | 0.4413 |
| P20827 | Ephrin-A1 | - | 0.4413 |
| P21926 | CD9 antigen | - | 0.4413 |
| P29401 | Transketolase | - | 0.4413 |
| P62937 | Peptidyl-prolyl cis-trans isomerase A | - | 0.4413 |
| Q01518 | Adenylyl cyclase-associated protein 1 | - | 0.4413 |
| Q13332 | Receptor-type tyrosine-protein phosphatase S | - | 0.4413 |
| Q14118 | Dystroglycan | - | 0.4413 |
| O43707 | Alpha-actinin-4 | - | 0.4631 |
| Q9H0E2 | Toll-interacting protein | - | 0.4631 |
| Q9Y287 | Integral membrane protein 2B | - | 0.4631 |
| O00115 | Deoxyribonuclease-2-alpha | - | 0.4652 |
| P01772 | Immunoglobulin heavy variable 3-33 | - | 0.4652 |
| P02747 | Complement C1q subcomponent subunit C | - | 0.4652 |
| P08670 | Vimentin | - | 0.4652 |
| P0C0L4 | Complement C4-A | - | 0.4652 |
| P22304 | Iduronate 2-sulfatase | - | 0.4652 |
| P28838 | Cytosol aminopeptidase | - | 0.4652 |
| P28907 | ADP-ribosyl cyclase/cyclic ADP-ribose hydrolase 1 | - | 0.4652 |
| P55145 | Mesencephalic astrocyte-derived neurotrophic factor | - | 0.4652 |
| Q6UXD5 | Seizure 6-like protein 2 | - | 0.4652 |
| Q9BZQ8 | Protein Niban | - | 0.4652 |
| Q9GZN4 | Brain-specific serine protease 4 | - | 0.4652 |
| Q9H4G4 | Golgi-associated plant pathogenesis-related protein 1 | - | 0.4652 |
| Q9UBP4 | Dickkopf-related protein 3 | - | 0.4652 |
| Q9UHC6 | Contactin-associated protein-like 2 | - | 0.4652 |
| P20062 | Transcobalamin-2 | - | 0.4838 |
| P22352 | Glutathione peroxidase 3 | - | 0.4838 |
| Q9Y2E5 | Epididymis-specific alpha-mannosidase | - | 0.4838 |
| P00390 | Glutathione reductase, mitochondrial | - | 0.4990 |
| P08246 | Neutrophil elastase | - | 0.4990 |
| P23526 | Adenosylhomocysteinase | - | 0.4990 |
| P30740 | Leukocyte elastase inhibitor | - | 0.4990 |
| Q9NS15 | Latent-transforming growth factor beta-binding protein 3 | - | 0.4990 |
| P04114 | Apolipoprotein B-100 | - | 0.5002 |
| P15586 | N-acetylglucosamine-6-sulfatase | - | 0.5002 |
| P19827 | Inter-alpha-trypsin inhibitor heavy chain H1 | - | 0.5002 |
| P25787 | Proteasome subunit alpha type-2 | - | 0.5002 |
| P31946 | 14-3-3 protein beta/alpha | - | 0.5002 |
| P61158 | Actin-related protein 3 | - | 0.5002 |
| P98095 | Fibulin-2 | - | 0.5002 |
| Q6XZB0 | Lipase member I | - | 0.5002 |
| Q969H8 | Myeloid-derived growth factor | - | 0.5002 |
| Q969X1 | Protein lifeguard 3 | - | 0.5002 |
| Q99988 | Growth/differentiation factor 15 | - | 0.5002 |
| Q9H0B8 | Cysteine-rich secretory protein LCCL domain-containing 2 | - | 0.5002 |
| B9A064 | Immunoglobulin lambda-like polypeptide 5 | - | 0.5147 |
| O14773 | Tripeptidyl-peptidase 1 | - | 0.5147 |
| O43653 | Prostate stem cell antigen | - | 0.5147 |
| P01024 | Complement C3 | - | 0.5147 |
| P01766 | Immunoglobulin heavy variable 3-13 | - | 0.5147 |
| P01877 | Immunoglobulin heavy constant alpha 2 | - | 0.5147 |
| P02679 | Fibrinogen gamma chain | - | 0.5147 |
| P02763 | Alpha-1-acid glycoprotein 1 | - | 0.5147 |
| P08571 | Monocyte differentiation antigen CD14 | - | 0.5147 |
| P09466 | Glycodelin | - | 0.5147 |
| P10909 | Clusterin | - | 0.5147 |
| P13796 | Plastin-2 | - | 0.5147 |
| P14780 | Matrix metalloproteinase-9 | - | 0.5147 |
| P19440 | Glutathione hydrolase 1 proenzyme | - | 0.5147 |
| P42785 | Lysosomal Pro-X carboxypeptidase | - | 0.5147 |
| Q02809 | Procollagen-lysine,2-oxoglutarate 5-dioxygenase 1 | - | 0.5147 |
| Q12841 | Follistatin-related protein 1 | - | 0.5147 |
| Q13162 | Peroxiredoxin-4 | - | 0.5147 |
| Q13232 | Nucleoside diphosphate kinase 3 | - | 0.5147 |
| Q15084 | Protein disulfide-isomerase A6 | - | 0.5147 |
| Q6UX06 | Olfactomedin-4 | - | 0.5147 |
| Q8IZJ3 | C3 and PZP-like alpha-2-macroglobulin domain-containing protein 8 | - | 0.5147 |
| Q9NQ79 | Cartilage acidic protein 1 | - | 0.5147 |
| P02671 | Fibrinogen alpha chain | - | 0.5754 |
| P06280 | Alpha-galactosidase A | - | 0.5754 |
| P15531 | Nucleoside diphosphate kinase A | - | 0.5754 |
| Q08629 | Testican-1 | - | 0.5754 |
| Q14515 | SPARC-like protein 1 | - | 0.5754 |
| Q96PD5 | N-acetylmuramoyl-L-alanine amidase | - | 0.5754 |
| Q9BRK5 | 45 kDa calcium-binding protein | - | 0.5754 |
| P01031 | Complement C5 | - | 0.5930 |
| P02746 | Complement C1q subcomponent subunit B | - | 0.5930 |
| P09467 | Fructose-1,6-bisphosphatase 1 | - | 0.5930 |
| P10586 | Receptor-type tyrosine-protein phosphatase F | - | 0.5930 |
| P11684 | Uteroglobin | - | 0.5930 |
| P12110 | Collagen alpha-2(VI) chain | - | 0.5930 |
| P17213 | Bactericidal permeability-increasing protein | - | 0.5930 |
| P25774 | Cathepsin S | - | 0.5930 |
| P27169 | Serum paraoxonase/arylesterase 1 | - | 0.5930 |
| P30044 | Peroxiredoxin-5, mitochondrial | - | 0.5930 |
| P43490 | Nicotinamide phosphoribosyltransferase | - | 0.5930 |
| P54289 | Voltage-dependent calcium channel subunit alpha-2/delta-1 | - | 0.5930 |
| P55259 | Pancreatic secretory granule membrane major glycoprotein GP2 | - | 0.5930 |
| Q14974 | Importin subunit beta-1 | - | 0.5930 |
| Q15631 | Translin | - | 0.5930 |
| Q7L266 | Isoaspartyl peptidase/L-asparaginase | - | 0.5930 |
| Q8N4F0 | BPI fold-containing family B member 2 | - | 0.5930 |
| Q93099 | Homogentisate 1,2-dioxygenase | - | 0.5930 |
| Q99985 | Semaphorin-3C | - | 0.5930 |
| Q9Y265 | RuvB-like 1 | - | 0.5930 |
| Q9Y3R5 | Protein dopey-2 | - | 0.5930 |
| O00391 | Sulfhydryl oxidase 1 | - | 0.5940 |
| O14672 | Disintegrin and metalloproteinase domain-containing protein 10 | - | 0.5940 |
| Q99880 | Histone H2B type 1-L | - | 0.5940 |
| P00491 | Purine nucleoside phosphorylase | - | 0.5940 |
| P00558 | Phosphoglycerate kinase 1 | - | 0.5940 |
| P00747 | Plasminogen | - | 0.5940 |
| P01008 | Antithrombin-III | - | 0.5940 |
| P01034 | Cystatin-C | - | 0.5940 |
| P02749 | Beta-2-glycoprotein 1 | - | 0.5940 |
| P04279 | Semenogelin-1 | - | 0.5940 |
| P06733 | Alpha-enolase | - | 0.5940 |
| P28799 | Granulins | - | 0.5940 |
| P30101 | Protein disulfide-isomerase A3 | - | 0.5940 |
| P0DP23 | Calmodulin-1 | - | 0.5940 |
| P0DP24 | Calmodulin-2 | - | 0.5940 |
| P0DP25 | Calmodulin-3 | - | 0.5940 |
| P62805 | Histone H4 | - | 0.5940 |
| P80723 | Brain acid soluble protein 1 | - | 0.5940 |
| Q6NT32 | Carboxylesterase 5A | - | 0.5940 |
| Q6UY27 | Prostate and testis expressed protein 2 | - | 0.5940 |
| Q8WVQ1 | Soluble calcium-activated nucleotidase 1 | - | 0.5940 |
| Q9GZX9 | Twisted gastrulation protein homolog 1 | - | 0.5940 |
| Q9HB40 | Retinoid-inducible serine carboxypeptidase | - | 0.5940 |
| Q9UHL4 | Dipeptidyl peptidase 2 | - | 0.5940 |
| O43692 | Peptidase inhibitor 15 | - | 0.6002 |
| P02760 | Protein AMBP | - | 0.6002 |
| P14778 | Interleukin-1 receptor type 1 | - | 0.6002 |
| P15121 | Aldose reductase | - | 0.6002 |
| P35052 | Glypican-1 | - | 0.6002 |
| P55058 | Phospholipid transfer protein | - | 0.6002 |
| P84077 | ADP-ribosylation factor 1 | - | 0.6002 |
| Q9UBC9 | Small proline-rich protein 3 | - | 0.6002 |
| O60635 | Tetraspanin-1 | - | 0.6121 |
| P17174 | Aspartate aminotransferase, cytoplasmic | - | 0.6121 |
| P34931 | Heat shock 70 kDa protein 1-like | - | 0.6121 |
| P80511 | Protein S100-A12 | - | 0.6121 |
| Q8WWA0 | Intelectin-1 | - | 0.6121 |
| O14556 | Glyceraldehyde-3-phosphate dehydrogenase, testis-specific | - | 0.6547 |
| O75787 | Renin receptor | - | 0.6547 |
| P01137 | Transforming growth factor beta-1 proprotein | - | 0.6547 |
| P06331 | Immunoglobulin heavy variable 4-34 | - | 0.6547 |
| P09525 | Annexin A4 | - | 0.6547 |
| P16930 | Fumarylacetoacetase | - | 0.6547 |
| P24158 | Myeloblastin | - | 0.6547 |
| P26885 | Peptidyl-prolyl cis-trans isomerase FKBP2 | - | 0.6547 |
| P31146 | Coronin-1A | - | 0.6547 |
| P31949 | Protein S100-A11 | - | 0.6547 |
| P35443 | Thrombospondin-4 | - | 0.6547 |
| P48594 | Serpin B4 | - | 0.6547 |
| P55774 | C-C motif chemokine 18 | - | 0.6547 |
| P63241 | Eukaryotic translation initiation factor 5A-1 | - | 0.6547 |
| Q13231 | Chitotriosidase-1 | - | 0.6547 |
| Q14624 | Inter-alpha-trypsin inhibitor heavy chain H4 | - | 0.6547 |
| Q6UWW0 | Lipocalin-15 | - | 0.6547 |
| Q7Z7M0 | Multiple epidermal growth factor-like domains protein 8 | - | 0.6547 |
| Q86SF2 | N-acetylgalactosaminyltransferase 7 | - | 0.6547 |
| Q8IYP2 | Serine protease 58 | - | 0.6547 |
| Q8WZ42 | Titin | - | 0.6547 |
| Q96A08 | Histone H2B type 1-A | - | 0.6547 |
| Q99715 | Collagen alpha-1(XII) chain | - | 0.6547 |
| Q9HBV2 | Sperm acrosome membrane-associated protein 1 | - | 0.6547 |
| Q9NQ84 | G-protein coupled receptor family C group 5 member C | - | 0.6547 |
| Q9NTM9 | Copper homeostasis protein cutC homolog | - | 0.6547 |
| Q9UKQ2 | Disintegrin and metalloproteinase domain-containing protein 28 | - | 0.6547 |
| Q9UM22 | Mammalian ependymin-related protein 1 | - | 0.6547 |
| P07355 | Annexin A2 | - | 0.6744 |
| P08236 | Beta-glucuronidase | - | 0.6744 |
| P17931 | Galectin-3 | - | 0.6744 |
| P19801 | Amiloride-sensitive amine oxidase [copper-containing] | - | 0.6744 |
| P51993 | Alpha-(1,3)-fucosyltransferase 6 | - | 0.6744 |
| P26038 | Moesin | - | 0.6744 |
| P60660 | Myosin light polypeptide 6 | - | 0.6744 |
| Q04760 | Lactoylglutathione lyase | - | 0.6744 |
| Q96L50 | Leucine-rich repeat protein 1 | - | 0.6744 |
| O00584 | Ribonuclease T2 | - | 0.6784 |
| O14578 | Citron Rho-interacting kinase | - | 0.6784 |
| O60568 | Procollagen-lysine,2-oxoglutarate 5-dioxygenase 3 | - | 0.6784 |
| O75882 | Attractin | - | 0.6784 |
| O95967 | EGF-containing fibulin-like extracellular matrix protein 2 | - | 0.6784 |
| P01033 | Metalloproteinase inhibitor 1 | - | 0.6784 |
| P01591 | Immunoglobulin J chain | - | 0.6784 |
| P02652 | Apolipoprotein A-II | - | 0.6784 |
| P02774 | Vitamin D-binding protein | - | 0.6784 |
| P02790 | Hemopexin | - | 0.6784 |
| P03973 | Antileukoproteinase | - | 0.6784 |
| P0DOY2 | Immunoglobulin lambda constant 2 | - | 0.6784 |
| P0DOY3 | Immunoglobulin lambda constant 3 | - | 0.6784 |
| P12821 | Angiotensin-converting enzyme | - | 0.6784 |
| P13473 | Lysosome-associated membrane glycoprotein 2 | - | 0.6784 |
| P22748 | Carbonic anhydrase 4 | - | 0.6784 |
| P43251 | Biotinidase | - | 0.6784 |
| P45877 | Peptidyl-prolyl cis-trans isomerase C | - | 0.6784 |
| P54108 | Cysteine-rich secretory protein 3 | - | 0.6784 |
| P58499 | Protein FAM3B | - | 0.6784 |
| P63104 | 14-3-3 protein zeta/delta | - | 0.6784 |
| Q13217 | DnaJ homolog subfamily C member 3 | - | 0.6784 |
| O43505 | Beta-1,4-glucuronyltransferase 1 | - | 0.6858 |
| P01037 | Cystatin-SN | - | 0.6858 |
| P10599 | Thioredoxin | - | 0.6858 |
| P15291 | Beta-1,4-galactosyltransferase 1 | - | 0.6858 |
| P23142 | Fibulin-1 | - | 0.6858 |
| P25786 | Proteasome subunit alpha type-1 | - | 0.6858 |
| P51159 | Ras-related protein Rab-27A | - | 0.6858 |
| P84243 | Histone H3.3 | - | 0.6858 |
| Q16270 | Insulin-like growth factor-binding protein 7 | - | 0.6858 |
| Q86VP6 | Cullin-associated NEDD8-dissociated protein 1 | - | 0.6858 |
| Q99828 | Calcium and integrin-binding protein 1 | - | 0.6858 |
| Q9H4B8 | Dipeptidase 3 | - | 0.6858 |
| P04220 | Immunoglobulin heavy constant mu | - | 0.7150 |
| P05546 | Heparin cofactor 2 | - | 0.7150 |
| P08134 | Rho-related GTP-binding protein RhoC | - | 0.7150 |
| P08174 | Complement decay-accelerating factor | - | 0.7150 |
| P09486 | SPARC | - | 0.7150 |
| P09960 | Leukotriene A-4 hydrolase | - | 0.7150 |
| P13861 | cAMP-dependent protein kinase type II-alpha regulatory subunit | - | 0.7150 |
| P19823 | Inter-alpha-trypsin inhibitor heavy chain H2 | - | 0.7150 |
| P28074 | Proteasome subunit beta type-5 | - | 0.7150 |
| P30046 | D-dopachrome decarboxylase | - | 0.7150 |
| P60900 | Proteasome subunit alpha type-6 | - | 0.7150 |
| P62834 | Ras-related protein Rap-1A | - | 0.7150 |
| Q04609 | Glutamate carboxypeptidase 2 | - | 0.7150 |
| Q86X29 | Lipolysis-stimulated lipoprotein receptor | - | 0.7150 |
| Q8NCW5 | NAD(P)H-hydrate epimerase | - | 0.7150 |
| Q8NG35 | Beta-defensin 105 | - | 0.7150 |
| Q96QH8 | Sperm acrosome-associated protein 5 | - | 0.7150 |
| Q12907 | Vesicular integral-membrane protein VIP36 | - | 0.7353 |
| P11047 | Laminin subunit gamma-1 | - | 0.7532 |
| P14543 | Nidogen-1 | - | 0.7532 |
| P19835 | Bile salt-activated lipase | - | 0.7532 |
| P26572 | Alpha-1,3-mannosyl-glycoprotein 2-beta-N-acetylglucosaminyltransferase | - | 0.7532 |
| P34059 | N-acetylgalactosamine-6-sulfatase | - | 0.7532 |
| P49720 | Proteasome subunit beta type-3 | - | 0.7532 |
| Q15435 | Protein phosphatase 1 regulatory subunit 7 | - | 0.7532 |
| Q9H336 | Cysteine-rich secretory protein LCCL domain-containing 1 | - | 0.7532 |
| O00468 | Agrin | - | 0.7671 |
| P02751 | Fibronectin | - | 0.7671 |
| P02787 | Serotransferrin | - | 0.7671 |
| P07339 | Cathepsin D | - | 0.7671 |
| P07711 | Cathepsin L1 | - | 0.7671 |
| P08118 | Beta-microseminoprotein | - | 0.7671 |
| P08253 | 72 kDa type IV collagenase | - | 0.7671 |
| P09668 | Pro-cathepsin H | - | 0.7671 |
| P13942 | Collagen alpha-2(XI) chain | - | 0.7671 |
| P13987 | CD59 glycoprotein | - | 0.7671 |
| P14625 | Endoplasmin | - | 0.7671 |
| P19652 | Alpha-1-acid glycoprotein 2 | - | 0.7671 |
| P22692 | Insulin-like growth factor-binding protein 4 | - | 0.7671 |
| P41222 | Prostaglandin-H2 D-isomerase | - | 0.7671 |
| P49908 | Selenoprotein P | - | 0.7671 |
| P60174 | Triosephosphate isomerase | - | 0.7671 |
| Q16610 | Extracellular matrix protein 1 | - | 0.7671 |
| Q96S96 | Phosphatidylethanolamine-binding protein 4 | - | 0.7671 |
| Q9H173 | Nucleotide exchange factor SIL1 | - | 0.7671 |
| Q9HAT2 | Sialate O-acetylesterase | - | 0.7671 |
| Q9UJJ9 | N-acetylglucosamine-1-phosphotransferase subunit gamma | - | 0.7671 |
| Q9Y6R7 | IgGFc-binding protein | - | 0.7671 |
| P00734 | Prothrombin | - | 0.7794 |
| P05090 | Apolipoprotein D | - | 0.7794 |
| P06727 | Apolipoprotein A-IV | - | 0.7794 |
| P20933 | N(4)-(beta-N-acetylglucosaminyl)-L-asparaginase | - | 0.7794 |
| P43652 | Afamin | - | 0.7794 |
| Q8WUM4 | Programmed cell death 6-interacting protein | - | 0.7794 |
| Q9BTY2 | Plasma alpha-L-fucosidase | - | 0.7794 |
| O75874 | Isocitrate dehydrogenase [NADP] cytoplasmic | - | 0.8590 |
| P01876 | Immunoglobulin heavy constant alpha 1 | - | 0.8590 |
| P05109 | Protein S100-A8 | - | 0.8590 |
| P06310 | Immunoglobulin kappa variable 2-30 | - | 0.8590 |
| P07288 | Prostate-specific antigen | - | 0.8590 |
| P07998 | Ribonuclease pancreatic | - | 0.8590 |
| P08758 | Annexin A5 | - | 0.8590 |
| P54107 | Cysteine-rich secretory protein 1 | - | 0.8590 |
| P56851 | Epididymal secretory protein E3-beta | - | 0.8590 |
| P61916 | NPC intracellular cholesterol transporter 2 | - | 0.8590 |
| P80188 | Neutrophil gelatinase-associated lipocalin | - | 0.8590 |
| Q01459 | Di-N-acetylchitobiase | - | 0.8590 |
| Q07654 | Trefoil factor 3 | - | 0.8590 |
| Q14393 | Growth arrest-specific protein 6 | - | 0.8590 |
| Q14508 | WAP four-disulfide core domain protein 2 | - | 0.8590 |
| Q6W4X9 | Mucin-6 | - | 0.8590 |
| Q9Y5X9 | Endothelial lipase | - | 0.8590 |
| O43657 | Tetraspanin-6 | - | 0.8658 |
| O95460 | Matrilin-4 | - | 0.8658 |
| P0C8F1 | Prostate and testis expressed protein 4 | - | 0.8658 |
| P12429 | Annexin A3 | - | 0.8658 |
| P19021 | Peptidyl-glycine alpha-amidating monooxygenase | - | 0.8658 |
| P20160 | Azurocidin | - | 0.8658 |
| P52209 | 6-phosphogluconate dehydrogenase, decarboxylating | - | 0.8658 |
| P61026 | Ras-related protein Rab-10 | - | 0.8658 |
| Q5GAN3 | Probable inactive ribonuclease-like protein 13 | - | 0.8658 |
| P12830 | Cadherin-1 | - | 0.8886 |
| P15311 | Ezrin | - | 0.8886 |
| P40189 | Interleukin-6 receptor subunit beta | - | 0.8886 |
| P51688 | N-sulphoglucosamine sulphohydrolase | - | 0.8886 |
| Q06828 | Fibromodulin | - | 0.8886 |
| Q96DA0 | Zymogen granule protein 16 homolog B | - | 0.8886 |
| Q9BWS9 | Chitinase domain-containing protein 1 | - | 0.8886 |
| Q9H2U9 | Disintegrin and metalloproteinase domain-containing protein 7 | - | 0.8886 |
| P10619 | Lysosomal protective protein | - | 0.8927 |
| P14555 | Phospholipase A2, membrane associated | - | 0.8927 |
| P48637 | Glutathione synthetase | - | 0.8927 |
| P69905 | Hemoglobin subunit alpha | - | 0.8927 |
| Q12913 | Receptor-type tyrosine-protein phosphatase eta | - | 0.8927 |
| Q13093 | Platelet-activating factor acetylhydrolase | - | 0.8927 |
| Q7Z4W1 | L-xylulose reductase | - | 0.8927 |
| Q8N5I2 | Arrestin domain-containing protein 1 | - | 0.8927 |
| Q93091 | Ribonuclease K6 | - | 0.8927 |
| Q96FJ2 | Dynein light chain 2, cytoplasmic | - | 0.8927 |
| O00469 | Procollagen-lysine,2-oxoglutarate 5-dioxygenase 2 | - | 0.9165 |
| P08195 | 4F2 cell-surface antigen heavy chain | - | 0.9165 |
| P68871 | Hemoglobin subunit beta | - | 0.9165 |
| Q8IVN8 | Somatomedin-B and thrombospondin type-1 domain-containing protein | - | 0.9165 |
| Q8NCL4 | Polypeptide N-acetylgalactosaminyltransferase 6 | - | 0.9165 |
| O00462 | Beta-mannosidase | - | 0.9528 |
| P01009 | Alpha-1-antitrypsin | - | 0.9528 |
| P01833 | Polymeric immunoglobulin receptor | - | 0.9528 |
| P01861 | Immunoglobulin heavy constant gamma 4 | - | 0.9528 |
| P04004 | Vitronectin | - | 0.9528 |
| P04066 | Tissue alpha-L-fucosidase | - | 0.9528 |
| P04083 | Annexin A1 | - | 0.9528 |
| P06858 | Lipoprotein lipase | - | 0.9528 |
| P07686 | Beta-hexosaminidase subunit beta | - | 0.9528 |
| P08697 | Alpha-2-antiplasmin | - | 0.9528 |
| P15289 | Arylsulfatase A | - | 0.9528 |
| P18065 | Insulin-like growth factor-binding protein 2 | - | 0.9528 |
| P20142 | Gastricsin | - | 0.9528 |
| P29622 | Kallistatin | - | 0.9528 |
| P32119 | Peroxiredoxin-2 | - | 0.9528 |
| P40925 | Malate dehydrogenase, cytoplasmic | - | 0.9528 |
| P53634 | Dipeptidyl peptidase 1 | - | 0.9528 |
| P55268 | Laminin subunit beta-2 | - | 0.9528 |
| P80748 | Immunoglobulin lambda variable 3-21 | - | 0.9528 |
| Q00796 | Sorbitol dehydrogenase | - | 0.9528 |
| Q02383 | Semenogelin-2 | - | 0.9528 |
| Q53H76 | Phospholipase A1 member A | - | 0.9528 |
| Q8N6Q3 | CD177 antigen | - | 0.9528 |
| Q92820 | Gamma-glutamyl hydrolase | - | 0.9528 |
| Q99538 | Legumain | - | 0.9528 |
| O15230 | Laminin subunit alpha-5 | - | 1.0000 |
| O43278 | Kunitz-type protease inhibitor 1 | - | 1.0000 |
| O95969 | Secretoglobin family 1D member 2 | - | 1.0000 |
| P00492 | Hypoxanthine-guanine phosphoribosyltransferase | - | 1.0000 |
| P10643 | Complement component C7 | - | 1.0000 |
| P12109 | Collagen alpha-1(VI) chain | - | 1.0000 |
| P17405 | Sphingomyelin phosphodiesterase | - | 1.0000 |
| P17612 | cAMP-dependent protein kinase catalytic subunit alpha | - | 1.0000 |
| P20336 | Ras-related protein Rab-3A | - | 1.0000 |
| P20618 | Proteasome subunit beta type-1 | - | 1.0000 |
| P22894 | Neutrophil collagenase | - | 1.0000 |
| P35858 | Insulin-like growth factor-binding protein complex acid labile subunit | - | 1.0000 |
| P39900 | Macrophage metalloelastase | - | 1.0000 |
| P49747 | Cartilage oligomeric matrix protein | - | 1.0000 |
| P50995 | Annexin A11 | - | 1.0000 |
| P54727 | UV excision repair protein RAD23 homolog B | - | 1.0000 |
| Q9H0U4 | Ras-related protein Rab-1B | - | 1.0000 |
| P68036 | Ubiquitin-conjugating enzyme E2 L3 | - | 1.0000 |
| Q12805 | EGF-containing fibulin-like extracellular matrix protein 1 | - | 1.0000 |
| Q15274 | Nicotinate-nucleotide pyrophosphorylase [carboxylating] | - | 1.0000 |
| Q15293 | Reticulocalbin-1 | - | 1.0000 |
| Q6UX73 | UPF0764 protein C16orf89 | - | 1.0000 |
| Q6ZWJ8 | Kielin/chordin-like protein | - | 1.0000 |
| Q92485 | Acid sphingomyelinase-like phosphodiesterase 3b | - | 1.0000 |
| Q9ULA0 | Aspartyl aminopeptidase | - | 1.0000 |
| Q9Y230 | RuvB-like 2 | - | 1.0000 |
